# Supplementary material
Source: MDPI journal article supplement (https://www.mdpi.com/2073-4352/14/5/469)
Supplement: s1 [file s1]

## Supplementary Material

# Cobalt and Iron Cyano Benzene Bis(Dithiolene) Complexes

António G. Costa <sup>1</sup>, Gonçalo Lopes <sup>1</sup>, João F. G. Rodrigues <sup>1</sup>, Isabel C. Santos <sup>1</sup>, Dulce Simão <sup>2</sup>, Elsa B. Lopes <sup>1</sup>,  
Laura C. J. Pereira <sup>1</sup>, Nolwenn Le Breton <sup>3</sup>, Sylvie Choua <sup>3</sup>, Stéphane A. Baudron <sup>4</sup>, Manuel Almeida <sup>1</sup>  
and Sandra Rabaça <sup>1,\*</sup>

<sup>1</sup> Centro de Ciências e Tecnologias Nucleares (C2TN), Associação do Instituto Superior Técnico para a Investigação e Desenvolvimento (IST-ID), Departamento de Engenharia e Tecnologias Nucleares (DECN), Instituto Superior Técnico (IST), Universidade de Lisboa, Estrada Nacional 10, 2695-066 Bobadela, Portugal;

antonio.costa@ctn.tecnico.ulisboa.pt (A.G.C.); goncaloblopes@ctn.tecnico.ulisboa.pt (G.L.); joao.p.faria.goncalves.rodrigues@tecnico.ulisboa.pt (J.F.G.R.); icsantos@ctn.tecnico.ulisboa.pt (I.C.S.); eblopes@ctn.tecnico.ulisboa.pt (E.B.L.); lpereira@ctn.tecnico.ulisboa.pt (L.C.J.P.); malmeida@ctn.tecnico.ulisboa.pt (M.A.)

<sup>2</sup> Centro de Química Estrutural (CQE), Associação do Instituto Superior Técnico para a Investigação e Desenvolvimento (IST-ID), Departamento de Engenharia Química (DEQ), Instituto Superior Técnico (IST), Universidade de Lisboa, Av. Rovisco Pais, 1049-001 Lisboa, Portugal; dulcesimao@tecnico.ulisboa.pt

<sup>3</sup> Institut de Chimie, UMR CNRS 7177, Université de Strasbourg, Institut Le Bel, 4 Rue Blaise Pascal, CS 90032, 67081 Strasbourg, France; nlebreton@unistra.fr (N.L.B.); sylvie.choua@unistra.fr (S.C.)

<sup>4</sup> CNRS, CMC UMR 7140, Université de Strasbourg, 4 rue Blaise Pascal, F-67000 Strasbourg, France; sbaudron@unistra.fr

\* Correspondence: sandrar@ctn.tecnico.ulisboa.pt

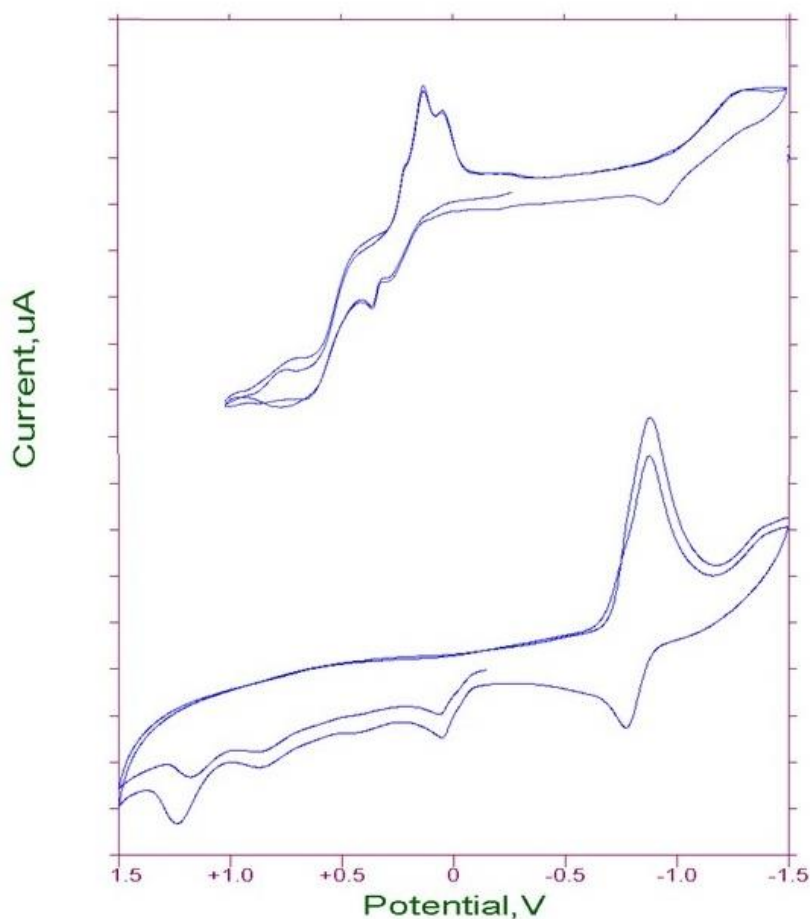

**Figure S1:** Cyclic voltammograms of  $[\text{Ph}_4\text{P}][\text{Fe}(\text{3cbdt})_2]$  (top) and  $[\text{Ph}_4\text{P}][\text{Co}(\text{3cbdt})_2]$  (bottom) in  $\text{CH}_3\text{CN}$  with  $[n\text{-Bu}_4\text{N}][\text{PF}_6]$  0.1 M as electrolyte, V vs.  $\text{Ag}/\text{Ag}^+$ , scan rate  $100 \text{ mV s}^{-1}$ .

**Table S1:** Redox potentials of  $[\text{M}(\text{L})_2]^{2-}/[\text{M}(\text{L})_2]^-$ ,  $\text{M} = \text{Co}, \text{Fe}$ ;  $\text{L} = \text{3-cbdt}$  and  $\text{4-cbdt}$  in acetonitrile (ref.  $\text{Ag}/\text{AgNO}_3$ )

|                                   | $[\text{M}(\text{L})_2]^-/[\text{M}(\text{L})_2]^{2-} \text{ (V)}$ | Ref       |
|-----------------------------------|--------------------------------------------------------------------|-----------|
| $[\text{Co}(\text{3cbdt})_2]$ (1) | -0.83                                                              | This work |
| $[\text{Co}(\text{4cbdt})_2]$     | -0.83                                                              | [34]      |
| $[\text{Co}(\text{dcbdt})_2]$     | -0.21                                                              | [24]      |
| $[\text{Fe}(\text{3cbdt})_2]$ (2) | -1.08                                                              | This work |
| $[\text{Fe}(\text{4cbdt})_2]$     | -0.72                                                              | [33]      |
| $[\text{Fe}(\text{dcbdt})_2]$     | -0.44                                                              | [30]      |

**Table S2:** Bond lengths [Å] and angles [deg] for compound **1**.

|              |           |
|--------------|-----------|
| Fe(1)-S(2)   | 2.215(2)  |
| Fe(1)-S(3)   | 2.217(2)  |
| Fe(1)-S(1)   | 2.219(2)  |
| Fe(1)-S(4)   | 2.221(2)  |
| Fe(1)-S(4)#1 | 2.461(2)  |
| S(2)-C(2)    | 1.744(7)  |
| S(1)-C(1)    | 1.722(7)  |
| S(4)-C(9)    | 1.757(7)  |
| S(4)-Fe(1)#1 | 2.461(2)  |
| S(3)-C(8)    | 1.743(7)  |
| P(1)-C(33)   | 1.772(7)  |
| P(1)-C(15)   | 1.782(7)  |
| P(1)-C(21)   | 1.798(7)  |
| P(1)-C(27)   | 1.801(8)  |
| Cl(1)-C(39)  | 1.708(11) |
| Cl(2)-C(39)  | 1.725(10) |
| N(1)-C(7)    | 1.195(11) |
| N(2)-C(14)   | 1.154(10) |
| C(2)-C(1)    | 1.414(9)  |
| C(2)-C(3)    | 1.415(9)  |
| C(3)-C(4)    | 1.410(10) |
| C(3)-H(3)    | 0.9500    |
| C(4)-C(5)    | 1.365(11) |
| C(4)-H(4)    | 0.9500    |
| C(5)-C(6)    | 1.377(10) |
| C(5)-H(5)    | 0.9500    |
| C(6)-C(7)    | 1.357(12) |
| C(6)-C(1)    | 1.393(9)  |
| C(9)-C(10)   | 1.374(9)  |
| C(9)-C(8)    | 1.408(9)  |
| C(10)-C(11)  | 1.386(9)  |
| C(10)-H(10)  | 0.9500    |
| C(11)-C(12)  | 1.370(10) |
| C(11)-H(11)  | 0.9500    |
| C(12)-C(13)  | 1.377(10) |
| C(12)-H(12)  | 0.9500    |
| C(13)-C(8)   | 1.421(9)  |
| C(13)-C(14)  | 1.450(11) |
| C(15)-C(16)  | 1.386(9)  |
| C(15)-C(20)  | 1.395(10) |
| C(16)-C(17)  | 1.369(10) |
| C(16)-H(16)  | 0.9500    |
| C(17)-C(18)  | 1.369(11) |

|                 |           |
|-----------------|-----------|
| C(17)-H(17)     | 0.9500    |
| C(18)-C(19)     | 1.334(10) |
| C(18)-H(18)     | 0.9500    |
| C(19)-C(20)     | 1.385(10) |
| C(19)-H(19)     | 0.9500    |
| C(20)-H(20)     | 0.9500    |
| C(21)-C(22)     | 1.388(10) |
| C(21)-C(26)     | 1.403(10) |
| C(22)-C(23)     | 1.370(9)  |
| C(22)-H(22)     | 0.9500    |
| C(23)-C(24)     | 1.380(10) |
| C(23)-H(23)     | 0.9500    |
| C(24)-C(25)     | 1.398(11) |
| C(24)-H(24)     | 0.9500    |
| C(25)-C(26)     | 1.358(9)  |
| C(25)-H(25)     | 0.9500    |
| C(26)-H(26)     | 0.9500    |
| C(27)-C(32)     | 1.372(10) |
| C(27)-C(28)     | 1.405(9)  |
| C(28)-C(29)     | 1.371(10) |
| C(28)-H(28)     | 0.9500    |
| C(29)-C(30)     | 1.378(10) |
| C(29)-H(29)     | 0.9500    |
| C(30)-C(31)     | 1.363(9)  |
| C(30)-H(30)     | 0.9500    |
| C(31)-C(32)     | 1.377(10) |
| C(31)-H(31)     | 0.9500    |
| C(32)-H(32)     | 0.9500    |
| C(33)-C(38)     | 1.379(9)  |
| C(33)-C(34)     | 1.410(9)  |
| C(34)-C(35)     | 1.388(9)  |
| C(34)-H(34)     | 0.9500    |
| C(35)-C(36)     | 1.369(9)  |
| C(35)-H(35)     | 0.9500    |
| C(36)-C(37)     | 1.363(9)  |
| C(36)-H(36)     | 0.9500    |
| C(37)-C(38)     | 1.386(9)  |
| C(37)-H(37)     | 0.9500    |
| C(38)-H(38)     | 0.9500    |
| C(39)-H(39A)    | 0.9900    |
| C(39)-H(39B)    | 0.9900    |
|                 |           |
| S(2)-Fe(1)-S(3) | 152.32(9) |
| S(2)-Fe(1)-S(1) | 89.38(8)  |
| S(3)-Fe(1)-S(1) | 88.14(8)  |
| S(2)-Fe(1)-S(4) | 87.50(8)  |

|                    |           |
|--------------------|-----------|
| S(3)-Fe(1)-S(4)    | 90.19(7)  |
| S(1)-Fe(1)-S(4)    | 169.96(9) |
| S(2)-Fe(1)-S(4)#1  | 102.91(8) |
| S(3)-Fe(1)-S(4)#1  | 104.77(8) |
| S(1)-Fe(1)-S(4)#1  | 95.55(7)  |
| S(4)-Fe(1)-S(4)#1  | 94.45(7)  |
| C(2)-S(2)-Fe(1)    | 104.5(3)  |
| C(1)-S(1)-Fe(1)    | 104.1(2)  |
| C(9)-S(4)-Fe(1)    | 105.7(3)  |
| C(9)-S(4)-Fe(1)#1  | 103.8(2)  |
| Fe(1)-S(4)-Fe(1)#1 | 85.55(7)  |
| C(8)-S(3)-Fe(1)    | 104.5(3)  |
| C(33)-P(1)-C(15)   | 106.9(3)  |
| C(33)-P(1)-C(21)   | 113.4(3)  |
| C(15)-P(1)-C(21)   | 108.7(4)  |
| C(33)-P(1)-C(27)   | 109.9(3)  |
| C(15)-P(1)-C(27)   | 109.6(4)  |
| C(21)-P(1)-C(27)   | 108.3(4)  |
| C(1)-C(2)-C(3)     | 121.7(7)  |
| C(1)-C(2)-S(2)     | 118.7(5)  |
| C(3)-C(2)-S(2)     | 119.5(6)  |
| C(4)-C(3)-C(2)     | 118.2(8)  |
| C(4)-C(3)-H(3)     | 120.9     |
| C(2)-C(3)-H(3)     | 120.9     |
| C(5)-C(4)-C(3)     | 120.4(8)  |
| C(5)-C(4)-H(4)     | 119.8     |
| C(3)-C(4)-H(4)     | 119.8     |
| C(4)-C(5)-C(6)     | 120.2(7)  |
| C(4)-C(5)-H(5)     | 119.9     |
| C(6)-C(5)-H(5)     | 119.9     |
| C(7)-C(6)-C(5)     | 119.0(8)  |
| C(7)-C(6)-C(1)     | 117.8(8)  |
| C(5)-C(6)-C(1)     | 123.2(7)  |
| C(6)-C(1)-C(2)     | 116.1(7)  |
| C(6)-C(1)-S(1)     | 123.7(6)  |
| C(2)-C(1)-S(1)     | 120.2(5)  |
| N(1)-C(7)-C(6)     | 175.8(10) |
| C(10)-C(9)-C(8)    | 120.3(7)  |
| C(10)-C(9)-S(4)    | 122.0(6)  |
| C(8)-C(9)-S(4)     | 117.7(5)  |
| C(9)-C(10)-C(11)   | 120.9(7)  |
| C(9)-C(10)-H(10)   | 119.5     |
| C(11)-C(10)-H(10)  | 119.5     |
| C(12)-C(11)-C(10)  | 120.2(7)  |
| C(12)-C(11)-H(11)  | 119.9     |
| C(10)-C(11)-H(11)  | 119.9     |

|                   |          |
|-------------------|----------|
| C(11)-C(12)-C(13) | 119.7(7) |
| C(11)-C(12)-H(12) | 120.1    |
| C(13)-C(12)-H(12) | 120.1    |
| C(12)-C(13)-C(8)  | 121.3(7) |
| C(12)-C(13)-C(14) | 120.2(7) |
| C(8)-C(13)-C(14)  | 118.4(7) |
| C(9)-C(8)-C(13)   | 117.0(6) |
| C(9)-C(8)-S(3)    | 121.8(5) |
| C(13)-C(8)-S(3)   | 121.1(6) |
| N(2)-C(14)-C(13)  | 177.9(9) |
| C(16)-C(15)-C(20) | 117.4(7) |
| C(16)-C(15)-P(1)  | 123.8(6) |
| C(20)-C(15)-P(1)  | 118.8(6) |
| C(17)-C(16)-C(15) | 120.1(8) |
| C(17)-C(16)-H(16) | 119.9    |
| C(15)-C(16)-H(16) | 119.9    |
| C(18)-C(17)-C(16) | 120.5(8) |
| C(18)-C(17)-H(17) | 119.8    |
| C(16)-C(17)-H(17) | 119.8    |
| C(19)-C(18)-C(17) | 121.5(8) |
| C(19)-C(18)-H(18) | 119.2    |
| C(17)-C(18)-H(18) | 119.2    |
| C(18)-C(19)-C(20) | 118.7(9) |
| C(18)-C(19)-H(19) | 120.6    |
| C(20)-C(19)-H(19) | 120.6    |
| C(19)-C(20)-C(15) | 121.7(8) |
| C(19)-C(20)-H(20) | 119.1    |
| C(15)-C(20)-H(20) | 119.1    |
| C(22)-C(21)-C(26) | 119.8(7) |
| C(22)-C(21)-P(1)  | 120.8(6) |
| C(26)-C(21)-P(1)  | 119.3(6) |
| C(23)-C(22)-C(21) | 120.2(7) |
| C(23)-C(22)-H(22) | 119.9    |
| C(21)-C(22)-H(22) | 119.9    |
| C(22)-C(23)-C(24) | 120.5(8) |
| C(22)-C(23)-H(23) | 119.8    |
| C(24)-C(23)-H(23) | 119.8    |
| C(23)-C(24)-C(25) | 118.9(8) |
| C(23)-C(24)-H(24) | 120.5    |
| C(25)-C(24)-H(24) | 120.5    |
| C(26)-C(25)-C(24) | 121.5(8) |
| C(26)-C(25)-H(25) | 119.2    |
| C(24)-C(25)-H(25) | 119.2    |
| C(25)-C(26)-C(21) | 119.0(8) |
| C(25)-C(26)-H(26) | 120.5    |
| C(21)-C(26)-H(26) | 120.5    |

|                     |          |
|---------------------|----------|
| C(32)-C(27)-C(28)   | 120.1(7) |
| C(32)-C(27)-P(1)    | 120.3(6) |
| C(28)-C(27)-P(1)    | 119.5(6) |
| C(29)-C(28)-C(27)   | 119.1(7) |
| C(29)-C(28)-H(28)   | 120.5    |
| C(27)-C(28)-H(28)   | 120.5    |
| C(28)-C(29)-C(30)   | 119.7(8) |
| C(28)-C(29)-H(29)   | 120.1    |
| C(30)-C(29)-H(29)   | 120.1    |
| C(31)-C(30)-C(29)   | 121.4(8) |
| C(31)-C(30)-H(30)   | 119.3    |
| C(29)-C(30)-H(30)   | 119.3    |
| C(30)-C(31)-C(32)   | 119.6(8) |
| C(30)-C(31)-H(31)   | 120.2    |
| C(32)-C(31)-H(31)   | 120.2    |
| C(27)-C(32)-C(31)   | 120.1(7) |
| C(27)-C(32)-H(32)   | 120.0    |
| C(31)-C(32)-H(32)   | 120.0    |
| C(38)-C(33)-C(34)   | 119.3(7) |
| C(38)-C(33)-P(1)    | 119.3(6) |
| C(34)-C(33)-P(1)    | 121.3(6) |
| C(35)-C(34)-C(33)   | 119.1(7) |
| C(35)-C(34)-H(34)   | 120.4    |
| C(33)-C(34)-H(34)   | 120.4    |
| C(36)-C(35)-C(34)   | 120.5(7) |
| C(36)-C(35)-H(35)   | 119.7    |
| C(34)-C(35)-H(35)   | 119.7    |
| C(37)-C(36)-C(35)   | 120.5(7) |
| C(37)-C(36)-H(36)   | 119.8    |
| C(35)-C(36)-H(36)   | 119.8    |
| C(36)-C(37)-C(38)   | 120.4(7) |
| C(36)-C(37)-H(37)   | 119.8    |
| C(38)-C(37)-H(37)   | 119.8    |
| C(33)-C(38)-C(37)   | 120.2(7) |
| C(33)-C(38)-H(38)   | 119.9    |
| C(37)-C(38)-H(38)   | 119.9    |
| Cl(1)-C(39)-Cl(2)   | 113.9(5) |
| Cl(1)-C(39)-H(39A)  | 108.8    |
| Cl(2)-C(39)-H(39A)  | 108.8    |
| Cl(1)-C(39)-H(39B)  | 108.8    |
| Cl(2)-C(39)-H(39B)  | 108.8    |
| H(39A)-C(39)-H(39B) | 107.7    |

Symmetry transformations used to generate equivalent atoms: #1 -x+1,-y,-z+1

**Table S3:** Bond lengths [Å] and angles [deg] for compound **2**.

|              |            |
|--------------|------------|
| Co(1)-S(2)   | 2.1797(12) |
| Co(1)-S(4)   | 2.1878(13) |
| Co(1)-S(1)   | 2.2027(13) |
| Co(1)-S(3)   | 2.2028(13) |
| Co(1)-S(4)#1 | 2.3513(12) |
| Cl(2)-C(1S)  | 1.734(10)  |
| Cl(1)-C(1S)  | 1.648(10)  |
| P(1)-C(21)   | 1.796(5)   |
| P(1)-C(33)   | 1.800(5)   |
| P(1)-C(27)   | 1.801(5)   |
| P(1)-C(15)   | 1.809(5)   |
| S(1)-C(1)    | 1.746(4)   |
| S(2)-C(2)    | 1.744(5)   |
| S(3)-C(8)    | 1.730(5)   |
| S(4)-C(9)    | 1.753(5)   |
| S(4)-Co(1)#1 | 2.3513(12) |
| N(1)-C(7)    | 1.153(7)   |
| N(2)-C(14)   | 1.144(8)   |
| C(1)-C(2)    | 1.388(7)   |
| C(1)-C(6)    | 1.403(6)   |
| C(2)-C(3)    | 1.406(6)   |
| C(3)-C(4)    | 1.383(8)   |
| C(3)-H(3)    | 0.9300     |
| C(4)-C(5)    | 1.359(8)   |
| C(4)-H(4)    | 0.9300     |
| C(5)-C(6)    | 1.402(7)   |
| C(5)-H(5)    | 0.9300     |
| C(6)-C(7)    | 1.384(7)   |
| C(8)-C(9)    | 1.382(7)   |
| C(8)-C(13)   | 1.427(6)   |
| C(9)-C(10)   | 1.401(7)   |
| C(10)-C(11)  | 1.383(7)   |
| C(10)-H(10)  | 0.9300     |
| C(11)-C(12)  | 1.392(9)   |
| C(11)-H(11)  | 0.9300     |
| C(12)-C(13)  | 1.385(8)   |
| C(12)-H(12)  | 0.9300     |
| C(13)-C(14)  | 1.430(8)   |
| C(15)-C(20)  | 1.373(7)   |
| C(15)-C(16)  | 1.386(7)   |
| C(16)-C(17)  | 1.384(7)   |
| C(16)-H(16)  | 0.9300     |
| C(17)-C(18)  | 1.359(8)   |
| C(17)-H(17)  | 0.9300     |



|                 |           |
|-----------------|-----------|
| C(18)-C(19)     | 1.379(8)  |
| C(18)-H(18)     | 0.9300    |
| C(19)-C(20)     | 1.378(8)  |
| C(19)-H(19)     | 0.9300    |
| C(20)-H(20)     | 0.9300    |
| C(21)-C(26)     | 1.380(7)  |
| C(21)-C(22)     | 1.388(7)  |
| C(22)-C(23)     | 1.369(8)  |
| C(22)-H(22)     | 0.9300    |
| C(23)-C(24)     | 1.368(8)  |
| C(23)-H(23)     | 0.9300    |
| C(24)-C(25)     | 1.360(8)  |
| C(24)-H(24)     | 0.9300    |
| C(25)-C(26)     | 1.380(7)  |
| C(25)-H(25)     | 0.9300    |
| C(26)-H(26)     | 0.9300    |
| C(27)-C(28)     | 1.372(7)  |
| C(27)-C(32)     | 1.389(7)  |
| C(28)-C(29)     | 1.390(8)  |
| C(28)-H(28)     | 0.9300    |
| C(29)-C(30)     | 1.357(9)  |
| C(29)-H(29)     | 0.9300    |
| C(30)-C(31)     | 1.370(9)  |
| C(30)-H(30)     | 0.9300    |
| C(31)-C(32)     | 1.376(8)  |
| C(31)-H(31)     | 0.9300    |
| C(32)-H(32)     | 0.9300    |
| C(33)-C(38)     | 1.373(7)  |
| C(33)-C(34)     | 1.380(7)  |
| C(34)-C(35)     | 1.382(7)  |
| C(34)-H(34)     | 0.9300    |
| C(35)-C(36)     | 1.371(9)  |
| C(35)-H(35)     | 0.9300    |
| C(36)-C(37)     | 1.378(9)  |
| C(36)-H(36)     | 0.9300    |
| C(37)-C(38)     | 1.382(8)  |
| C(37)-H(37)     | 0.9300    |
| C(38)-H(38)     | 0.9300    |
| C(1S)-H(1A)     | 0.9700    |
| C(1S)-H(1B)     | 0.9700    |
|                 |           |
| S(2)-Co(1)-S(4) | 88.50(5)  |
| S(2)-Co(1)-S(1) | 90.87(5)  |
| S(4)-Co(1)-S(1) | 177.18(5) |
| S(2)-Co(1)-S(3) | 155.41(6) |
| S(4)-Co(1)-S(3) | 91.11(5)  |

|                    |            |
|--------------------|------------|
| S(1)-Co(1)-S(3)    | 88.32(5)   |
| S(2)-Co(1)-S(4)#1  | 103.39(5)  |
| S(4)-Co(1)-S(4)#1  | 89.57(4)   |
| S(1)-Co(1)-S(4)#1  | 93.25(5)   |
| S(3)-Co(1)-S(4)#1  | 101.19(5)  |
| C(21)-P(1)-C(33)   | 108.1(2)   |
| C(21)-P(1)-C(27)   | 108.7(2)   |
| C(33)-P(1)-C(27)   | 109.8(2)   |
| C(21)-P(1)-C(15)   | 113.2(2)   |
| C(33)-P(1)-C(15)   | 110.2(2)   |
| C(27)-P(1)-C(15)   | 106.9(2)   |
| C(1)-S(1)-Co(1)    | 103.28(16) |
| C(2)-S(2)-Co(1)    | 103.69(16) |
| C(8)-S(3)-Co(1)    | 103.34(17) |
| C(9)-S(4)-Co(1)    | 104.48(17) |
| C(9)-S(4)-Co(1)#1  | 106.24(15) |
| Co(1)-S(4)-Co(1)#1 | 90.43(4)   |
| C(2)-C(1)-C(6)     | 119.3(4)   |
| C(2)-C(1)-S(1)     | 119.5(4)   |
| C(6)-C(1)-S(1)     | 121.2(4)   |
| C(1)-C(2)-C(3)     | 119.9(5)   |
| C(1)-C(2)-S(2)     | 120.1(3)   |
| C(3)-C(2)-S(2)     | 120.0(4)   |
| C(4)-C(3)-C(2)     | 119.8(5)   |
| C(4)-C(3)-H(3)     | 120.1      |
| C(2)-C(3)-H(3)     | 120.1      |
| C(5)-C(4)-C(3)     | 121.0(5)   |
| C(5)-C(4)-H(4)     | 119.5      |
| C(3)-C(4)-H(4)     | 119.5      |
| C(4)-C(5)-C(6)     | 120.1(5)   |
| C(4)-C(5)-H(5)     | 119.9      |
| C(6)-C(5)-H(5)     | 119.9      |
| C(7)-C(6)-C(5)     | 119.0(5)   |
| C(7)-C(6)-C(1)     | 121.1(5)   |
| C(5)-C(6)-C(1)     | 119.9(5)   |
| N(1)-C(7)-C(6)     | 177.7(6)   |
| C(9)-C(8)-C(13)    | 117.8(5)   |
| C(9)-C(8)-S(3)     | 121.7(4)   |
| C(13)-C(8)-S(3)    | 120.5(4)   |
| C(8)-C(9)-C(10)    | 121.0(5)   |
| C(8)-C(9)-S(4)     | 118.6(4)   |
| C(10)-C(9)-S(4)    | 120.4(4)   |
| C(11)-C(10)-C(9)   | 120.6(5)   |
| C(11)-C(10)-H(10)  | 119.7      |
| C(9)-C(10)-H(10)   | 119.7      |
| C(10)-C(11)-C(12)  | 119.5(5)   |

|                   |          |
|-------------------|----------|
| C(10)-C(11)-H(11) | 120.3    |
| C(12)-C(11)-H(11) | 120.3    |
| C(13)-C(12)-C(11) | 120.2(5) |
| C(13)-C(12)-H(12) | 119.9    |
| C(11)-C(12)-H(12) | 119.9    |
| C(12)-C(13)-C(8)  | 120.9(5) |
| C(12)-C(13)-C(14) | 119.4(5) |
| C(8)-C(13)-C(14)  | 119.6(5) |
| N(2)-C(14)-C(13)  | 176.9(7) |
| C(20)-C(15)-C(16) | 121.5(5) |
| C(20)-C(15)-P(1)  | 118.5(4) |
| C(16)-C(15)-P(1)  | 120.0(4) |
| C(17)-C(16)-C(15) | 117.9(5) |
| C(17)-C(16)-H(16) | 121.1    |
| C(15)-C(16)-H(16) | 121.1    |
| C(18)-C(17)-C(16) | 121.2(5) |
| C(18)-C(17)-H(17) | 119.4    |
| C(16)-C(17)-H(17) | 119.4    |
| C(17)-C(18)-C(19) | 120.3(6) |
| C(17)-C(18)-H(18) | 119.9    |
| C(19)-C(18)-H(18) | 119.9    |
| C(20)-C(19)-C(18) | 119.8(6) |
| C(20)-C(19)-H(19) | 120.1    |
| C(18)-C(19)-H(19) | 120.1    |
| C(15)-C(20)-C(19) | 119.3(5) |
| C(15)-C(20)-H(20) | 120.3    |
| C(19)-C(20)-H(20) | 120.3    |
| C(26)-C(21)-C(22) | 119.0(5) |
| C(26)-C(21)-P(1)  | 121.1(4) |
| C(22)-C(21)-P(1)  | 119.9(4) |
| C(23)-C(22)-C(21) | 119.7(5) |
| C(23)-C(22)-H(22) | 120.2    |
| C(21)-C(22)-H(22) | 120.2    |
| C(24)-C(23)-C(22) | 120.9(5) |
| C(24)-C(23)-H(23) | 119.5    |
| C(22)-C(23)-H(23) | 119.5    |
| C(25)-C(24)-C(23) | 120.0(6) |
| C(25)-C(24)-H(24) | 120.0    |
| C(23)-C(24)-H(24) | 120.0    |
| C(24)-C(25)-C(26) | 120.0(5) |
| C(24)-C(25)-H(25) | 120.0    |
| C(26)-C(25)-H(25) | 120.0    |
| C(25)-C(26)-C(21) | 120.4(5) |
| C(25)-C(26)-H(26) | 119.8    |
| C(21)-C(26)-H(26) | 119.8    |
| C(28)-C(27)-C(32) | 120.1(5) |

|                   |          |
|-------------------|----------|
| C(28)-C(27)-P(1)  | 122.3(4) |
| C(32)-C(27)-P(1)  | 117.6(4) |
| C(27)-C(28)-C(29) | 119.3(5) |
| C(27)-C(28)-H(28) | 120.3    |
| C(29)-C(28)-H(28) | 120.3    |
| C(30)-C(29)-C(28) | 120.2(6) |
| C(30)-C(29)-H(29) | 119.9    |
| C(28)-C(29)-H(29) | 119.9    |
| C(29)-C(30)-C(31) | 120.9(6) |
| C(29)-C(30)-H(30) | 119.5    |
| C(31)-C(30)-H(30) | 119.5    |
| C(30)-C(31)-C(32) | 119.7(6) |
| C(30)-C(31)-H(31) | 120.2    |
| C(32)-C(31)-H(31) | 120.2    |
| C(31)-C(32)-C(27) | 119.8(5) |
| C(31)-C(32)-H(32) | 120.1    |
| C(27)-C(32)-H(32) | 120.1    |
| C(38)-C(33)-C(34) | 119.9(5) |
| C(38)-C(33)-P(1)  | 120.2(4) |
| C(34)-C(33)-P(1)  | 119.9(4) |
| C(33)-C(34)-C(35) | 120.1(5) |
| C(33)-C(34)-H(34) | 120.0    |
| C(35)-C(34)-H(34) | 120.0    |
| C(36)-C(35)-C(34) | 119.9(6) |
| C(36)-C(35)-H(35) | 120.0    |
| C(34)-C(35)-H(35) | 120.0    |
| C(35)-C(36)-C(37) | 120.2(5) |
| C(35)-C(36)-H(36) | 119.9    |
| C(37)-C(36)-H(36) | 119.9    |
| C(36)-C(37)-C(38) | 119.9(6) |
| C(36)-C(37)-H(37) | 120.0    |
| C(38)-C(37)-H(37) | 120.0    |
| C(33)-C(38)-C(37) | 120.0(6) |
| C(33)-C(38)-H(38) | 120.0    |
| C(37)-C(38)-H(38) | 120.0    |
| Cl(1)-C(1S)-Cl(2) | 116.0(5) |
| Cl(1)-C(1S)-H(1A) | 108.3    |
| Cl(2)-C(1S)-H(1A) | 108.3    |
| Cl(1)-C(1S)-H(1B) | 108.3    |
| Cl(2)-C(1S)-H(1B) | 108.3    |
| H(1A)-C(1S)-H(1B) | 107.4    |

Symmetry transformations used to generate equivalent atoms: #1 -x,-y+1,-z+2

**Table S4:** Bond lengths [Å] and angles [deg] for compound **3**.

|              |           |
|--------------|-----------|
| Co(1)-S(1)#1 | 2.174(2)  |
| Co(1)-S(1)   | 2.174(2)  |
| Co(1)-S(2)#1 | 2.185(2)  |
| Co(1)-S(2)   | 2.185(2)  |
| Co(2)-S(3)#2 | 2.169(3)  |
| Co(2)-S(3)   | 2.169(3)  |
| Co(2)-S(4)   | 2.189(3)  |
| Co(2)-S(4)#2 | 2.189(3)  |
| Co(3)-S(7)   | 2.170(3)  |
| Co(3)-S(5)   | 2.170(3)  |
| Co(3)-S(8)   | 2.182(3)  |
| Co(3)-S(6)   | 2.184(3)  |
| Co(4)-S(9)   | 2.162(3)  |
| Co(4)-S(11)  | 2.172(3)  |
| Co(4)-S(12)  | 2.175(3)  |
| Co(4)-S(10)  | 2.191(4)  |
| P(1)-C(19A)  | 1.779(8)  |
| P(1)-C(13A)  | 1.785(10) |
| P(1)-C(7A)   | 1.795(8)  |
| P(1)-C(1A)   | 1.800(10) |
| P(2)-C(7B)   | 1.766(8)  |
| P(2)-C(1B)   | 1.777(8)  |
| P(2)-C(19B)  | 1.778(9)  |
| P(2)-C(13B)  | 1.782(8)  |
| P(3)-C(13C)  | 1.756(10) |
| P(3)-C(1C)   | 1.779(8)  |
| P(3)-C(19C)  | 1.789(9)  |
| P(3)-C(7C)   | 1.812(9)  |
| P(4)-C(19D)  | 1.758(11) |
| P(4)-C(7D)   | 1.790(10) |
| P(4)-C(13D)  | 1.799(10) |
| P(4)-C(1D)   | 1.802(9)  |
| P(5)-C(1E)   | 1.751(9)  |
| P(5)-C(7E)   | 1.752(8)  |
| P(5)-C(13E)  | 1.775(8)  |
| P(5)-C(19E)  | 1.804(9)  |
| P(6)-C(7F)   | 1.770(10) |
| P(6)-C(13F)  | 1.790(10) |
| P(6)-C(19F)  | 1.801(8)  |
| P(6)-C(1F)   | 1.806(10) |
| S(1)-C(1)    | 1.726(8)  |
| S(2)-C(2)    | 1.766(9)  |
| S(3)-C(8)    | 1.740(12) |
| S(4)-C(9)    | 1.767(11) |

|             |           |
|-------------|-----------|
| S(5)-C(15)  | 1.753(8)  |
| S(6)-C(16)  | 1.733(10) |
| S(7)-C(22)  | 1.746(5)  |
| S(8)-C(23)  | 1.751(5)  |
| S(9)-C(29)  | 1.763(6)  |
| S(10)-C(30) | 1.724(6)  |
| S(11)-C(37) | 1.744(10) |
| S(12)-C(36) | 1.736(9)  |
| N(1)-C(7)   | 1.140(11) |
| N(2)-C(14)  | 1.132(15) |
| N(3)-C(21)  | 1.095(13) |
| N(4)-C(28)  | 1.172(11) |
| N(5)-C(35)  | 1.248(13) |
| N(6)-C(42)  | 1.133(11) |
| C(1)-C(6)   | 1.391(10) |
| C(1)-C(2)   | 1.395(11) |
| C(2)-C(3)   | 1.378(11) |
| C(3)-C(4)   | 1.397(12) |
| C(4)-C(5)   | 1.368(12) |
| C(5)-C(6)   | 1.372(11) |
| C(6)-C(7)   | 1.452(13) |
| C(8)-C(9)   | 1.340(12) |
| C(8)-C(13)  | 1.416(15) |
| C(9)-C(10)  | 1.415(15) |
| C(10)-C(11) | 1.368(16) |
| C(11)-C(12) | 1.381(16) |
| C(12)-C(13) | 1.358(16) |
| C(13)-C(14) | 1.488(17) |
| C(15)-C(16) | 1.393(10) |
| C(15)-C(20) | 1.410(11) |
| C(16)-C(17) | 1.423(11) |
| C(17)-C(18) | 1.367(12) |
| C(18)-C(19) | 1.362(12) |
| C(19)-C(20) | 1.407(12) |
| C(20)-C(21) | 1.495(14) |
| C(22)-C(23) | 1.3900    |
| C(22)-C(27) | 1.3900    |
| C(23)-C(24) | 1.3900    |
| C(24)-C(25) | 1.3900    |
| C(25)-C(26) | 1.3900    |
| C(26)-C(27) | 1.3900    |
| C(27)-C(28) | 1.365(11) |
| C(29)-C(30) | 1.3900    |
| C(29)-C(34) | 1.3900    |
| C(30)-C(31) | 1.3900    |
| C(31)-C(32) | 1.3900    |

|               |           |
|---------------|-----------|
| C(32)-C(33)   | 1.3900    |
| C(33)-C(34)   | 1.3900    |
| C(34)-C(35)   | 1.337(11) |
| C(36)-C(41)   | 1.391(11) |
| C(36)-C(37)   | 1.400(11) |
| C(37)-C(38)   | 1.379(13) |
| C(38)-C(39)   | 1.379(13) |
| C(39)-C(40)   | 1.382(12) |
| C(40)-C(41)   | 1.401(13) |
| C(41)-C(42)   | 1.463(13) |
| C(1A)-C(2A)   | 1.366(12) |
| C(1A)-C(6A)   | 1.390(11) |
| C(2A)-C(3A)   | 1.383(14) |
| C(3A)-C(4A)   | 1.338(14) |
| C(4A)-C(5A)   | 1.347(15) |
| C(5A)-C(6A)   | 1.380(16) |
| C(7A)-C(8A)   | 1.369(12) |
| C(7A)-C(12A)  | 1.393(11) |
| C(8A)-C(9A)   | 1.404(11) |
| C(9A)-C(10A)  | 1.342(13) |
| C(10A)-C(11A) | 1.327(13) |
| C(11A)-C(12A) | 1.401(11) |
| C(13A)-C(18A) | 1.362(13) |
| C(13A)-C(14A) | 1.404(12) |
| C(14A)-C(15A) | 1.376(14) |
| C(15A)-C(16A) | 1.305(17) |
| C(16A)-C(17A) | 1.360(14) |
| C(17A)-C(18A) | 1.390(13) |
| C(19A)-C(20A) | 1.373(10) |
| C(19A)-C(24A) | 1.406(10) |
| C(20A)-C(21A) | 1.380(11) |
| C(21A)-C(22A) | 1.367(11) |
| C(22A)-C(23A) | 1.327(10) |
| C(23A)-C(24A) | 1.370(11) |
| C(1B)-C(6B)   | 1.386(12) |
| C(1B)-C(2B)   | 1.390(12) |
| C(2B)-C(3B)   | 1.371(12) |
| C(3B)-C(4B)   | 1.370(14) |
| C(4B)-C(5B)   | 1.350(14) |
| C(5B)-C(6B)   | 1.364(12) |
| C(7B)-C(12B)  | 1.369(11) |
| C(7B)-C(8B)   | 1.373(10) |
| C(8B)-C(9B)   | 1.381(11) |
| C(9B)-C(10B)  | 1.353(13) |
| C(10B)-C(11B) | 1.359(13) |
| C(11B)-C(12B) | 1.400(11) |

|               |           |
|---------------|-----------|
| C(13B)-C(14B) | 1.380(11) |
| C(13B)-C(18B) | 1.403(10) |
| C(14B)-C(15B) | 1.389(12) |
| C(15B)-C(16B) | 1.356(11) |
| C(16B)-C(17B) | 1.362(12) |
| C(17B)-C(18B) | 1.362(11) |
| C(19B)-C(24B) | 1.377(10) |
| C(19B)-C(20B) | 1.398(11) |
| C(20B)-C(21B) | 1.346(12) |
| C(21B)-C(22B) | 1.390(11) |
| C(22B)-C(23B) | 1.369(11) |
| C(23B)-C(24B) | 1.352(12) |
| C(1C)-C(6C)   | 1.368(13) |
| C(1C)-C(2C)   | 1.391(12) |
| C(2C)-C(3C)   | 1.379(12) |
| C(3C)-C(4C)   | 1.346(15) |
| C(4C)-C(5C)   | 1.360(15) |
| C(5C)-C(6C)   | 1.374(12) |
| C(7C)-C(12C)  | 1.367(11) |
| C(7C)-C(8C)   | 1.393(11) |
| C(8C)-C(9C)   | 1.391(12) |
| C(9C)-C(10C)  | 1.350(14) |
| C(10C)-C(11C) | 1.353(14) |
| C(11C)-C(12C) | 1.408(13) |
| C(13C)-C(18C) | 1.382(12) |
| C(13C)-C(14C) | 1.391(10) |
| C(14C)-C(15C) | 1.402(14) |
| C(15C)-C(16C) | 1.343(13) |
| C(16C)-C(17C) | 1.403(13) |
| C(17C)-C(18C) | 1.349(14) |
| C(19C)-C(20C) | 1.389(12) |
| C(19C)-C(24C) | 1.403(12) |
| C(20C)-C(21C) | 1.401(14) |
| C(21C)-C(22C) | 1.346(17) |
| C(22C)-C(23C) | 1.301(16) |
| C(23C)-C(24C) | 1.401(13) |
| C(1D)-C(6D)   | 1.380(11) |
| C(1D)-C(2D)   | 1.393(11) |
| C(2D)-C(3D)   | 1.362(11) |
| C(3D)-C(4D)   | 1.357(13) |
| C(4D)-C(5D)   | 1.352(14) |
| C(5D)-C(6D)   | 1.357(12) |
| C(7D)-C(8D)   | 1.363(12) |
| C(7D)-C(12D)  | 1.380(11) |
| C(8D)-C(9D)   | 1.407(13) |
| C(9D)-C(10D)  | 1.343(14) |



|               |           |
|---------------|-----------|
| C(10D)-C(11D) | 1.371(16) |
| C(11D)-C(12D) | 1.378(15) |
| C(13D)-C(18D) | 1.402(12) |
| C(13D)-C(14D) | 1.405(11) |
| C(14D)-C(15D) | 1.412(13) |
| C(15D)-C(16D) | 1.365(13) |
| C(16D)-C(17D) | 1.348(12) |
| C(17D)-C(18D) | 1.373(13) |
| C(19D)-C(20D) | 1.366(14) |
| C(19D)-C(24D) | 1.408(15) |
| C(20D)-C(21D) | 1.439(14) |
| C(21D)-C(22D) | 1.385(18) |
| C(22D)-C(23D) | 1.360(18) |
| C(23D)-C(24D) | 1.349(15) |
| C(1E)-C(6E)   | 1.363(11) |
| C(1E)-C(2E)   | 1.381(10) |
| C(2E)-C(3E)   | 1.367(12) |
| C(3E)-C(4E)   | 1.362(13) |
| C(4E)-C(5E)   | 1.376(12) |
| C(5E)-C(6E)   | 1.393(12) |
| C(7E)-C(12E)  | 1.392(11) |
| C(7E)-C(8E)   | 1.409(10) |
| C(8E)-C(9E)   | 1.390(11) |
| C(9E)-C(10E)  | 1.343(14) |
| C(10E)-C(11E) | 1.317(13) |
| C(11E)-C(12E) | 1.403(12) |
| C(13E)-C(18E) | 1.373(11) |
| C(13E)-C(14E) | 1.411(11) |
| C(14E)-C(15E) | 1.374(11) |
| C(15E)-C(16E) | 1.343(13) |
| C(16E)-C(71E) | 1.369(13) |
| C(71E)-C(18E) | 1.385(10) |
| C(19E)-C(24E) | 1.352(10) |
| C(19E)-C(20E) | 1.386(11) |
| C(20E)-C(21E) | 1.356(13) |
| C(21E)-C(22E) | 1.368(13) |
| C(22E)-C(23E) | 1.348(14) |
| C(23E)-C(24E) | 1.394(13) |
| C(1F)-C(6F)   | 1.327(11) |
| C(1F)-C(2F)   | 1.379(12) |
| C(2F)-C(3F)   | 1.403(14) |
| C(3F)-C(4F)   | 1.306(14) |
| C(4F)-C(5F)   | 1.351(13) |
| C(5F)-C(6F)   | 1.410(12) |
| C(7F)-C(8F)   | 1.357(11) |
| C(7F)-C(12F)  | 1.419(13) |

|                     |            |
|---------------------|------------|
| C(8F)-C(9F)         | 1.420(14)  |
| C(9F)-C(10F)        | 1.337(13)  |
| C(10F)-C(11F)       | 1.332(15)  |
| C(11F)-C(12F)       | 1.466(16)  |
| C(13F)-C(14F)       | 1.382(12)  |
| C(13F)-C(18F)       | 1.414(12)  |
| C(14F)-C(15F)       | 1.364(15)  |
| C(15F)-C(16F)       | 1.360(14)  |
| C(16F)-C(17F)       | 1.363(14)  |
| C(17F)-C(18F)       | 1.380(14)  |
| C(19F)-C(24F)       | 1.373(11)  |
| C(19F)-C(20F)       | 1.381(12)  |
| C(20F)-C(21F)       | 1.358(12)  |
| C(21F)-C(22F)       | 1.365(14)  |
| C(22F)-C(23F)       | 1.374(14)  |
| C(23F)-C(24F)       | 1.383(11)  |
|                     |            |
| S(1)#1-Co(1)-S(1)   | 180.00(9)  |
| S(1)#1-Co(1)-S(2)#1 | 90.44(9)   |
| S(1)-Co(1)-S(2)#1   | 89.56(9)   |
| S(1)#1-Co(1)-S(2)   | 89.56(9)   |
| S(1)-Co(1)-S(2)     | 90.44(9)   |
| S(2)#1-Co(1)-S(2)   | 180.0      |
| S(3)#2-Co(2)-S(3)   | 180.00(10) |
| S(3)#2-Co(2)-S(4)   | 89.73(11)  |
| S(3)-Co(2)-S(4)     | 90.27(11)  |
| S(3)#2-Co(2)-S(4)#2 | 90.27(11)  |
| S(3)-Co(2)-S(4)#2   | 89.73(11)  |
| S(4)-Co(2)-S(4)#2   | 180.0      |
| S(7)-Co(3)-S(5)     | 88.31(10)  |
| S(7)-Co(3)-S(8)     | 90.85(10)  |
| S(5)-Co(3)-S(8)     | 171.11(13) |
| S(7)-Co(3)-S(6)     | 174.15(13) |
| S(5)-Co(3)-S(6)     | 91.33(10)  |
| S(8)-Co(3)-S(6)     | 90.39(11)  |
| S(9)-Co(4)-S(11)    | 87.79(12)  |
| S(9)-Co(4)-S(12)    | 174.07(12) |
| S(11)-Co(4)-S(12)   | 91.42(11)  |
| S(9)-Co(4)-S(10)    | 90.74(14)  |
| S(11)-Co(4)-S(10)   | 176.35(13) |
| S(12)-Co(4)-S(10)   | 90.38(12)  |
| C(19A)-P(1)-C(13A)  | 109.5(5)   |
| C(19A)-P(1)-C(7A)   | 110.9(4)   |
| C(13A)-P(1)-C(7A)   | 106.9(4)   |
| C(19A)-P(1)-C(1A)   | 107.0(5)   |
| C(13A)-P(1)-C(1A)   | 113.8(5)   |

|                    |          |
|--------------------|----------|
| C(7A)-P(1)-C(1A)   | 108.8(5) |
| C(7B)-P(2)-C(1B)   | 107.8(4) |
| C(7B)-P(2)-C(19B)  | 107.9(4) |
| C(1B)-P(2)-C(19B)  | 112.3(5) |
| C(7B)-P(2)-C(13B)  | 113.2(4) |
| C(1B)-P(2)-C(13B)  | 108.8(4) |
| C(19B)-P(2)-C(13B) | 107.0(4) |
| C(13C)-P(3)-C(1C)  | 110.5(5) |
| C(13C)-P(3)-C(19C) | 108.0(5) |
| C(1C)-P(3)-C(19C)  | 110.5(4) |
| C(13C)-P(3)-C(7C)  | 110.1(4) |
| C(1C)-P(3)-C(7C)   | 108.5(4) |
| C(19C)-P(3)-C(7C)  | 109.2(5) |
| C(19D)-P(4)-C(7D)  | 108.6(6) |
| C(19D)-P(4)-C(13D) | 110.6(5) |
| C(7D)-P(4)-C(13D)  | 110.4(4) |
| C(19D)-P(4)-C(1D)  | 111.8(5) |
| C(7D)-P(4)-C(1D)   | 107.8(5) |
| C(13D)-P(4)-C(1D)  | 107.6(5) |
| C(1E)-P(5)-C(7E)   | 109.4(4) |
| C(1E)-P(5)-C(13E)  | 108.7(4) |
| C(7E)-P(5)-C(13E)  | 113.5(4) |
| C(1E)-P(5)-C(19E)  | 108.5(4) |
| C(7E)-P(5)-C(19E)  | 107.6(5) |
| C(13E)-P(5)-C(19E) | 109.0(4) |
| C(7F)-P(6)-C(13F)  | 106.9(5) |
| C(7F)-P(6)-C(19F)  | 108.3(4) |
| C(13F)-P(6)-C(19F) | 108.8(4) |
| C(7F)-P(6)-C(1F)   | 112.8(5) |
| C(13F)-P(6)-C(1F)  | 110.2(5) |
| C(19F)-P(6)-C(1F)  | 109.7(4) |
| C(1)-S(1)-Co(1)    | 106.2(3) |
| C(2)-S(2)-Co(1)    | 105.1(3) |
| C(8)-S(3)-Co(2)    | 105.4(5) |
| C(9)-S(4)-Co(2)    | 104.4(5) |
| C(15)-S(5)-Co(3)   | 104.5(3) |
| C(16)-S(6)-Co(3)   | 104.8(3) |
| C(22)-S(7)-Co(3)   | 105.8(3) |
| C(23)-S(8)-Co(3)   | 104.8(3) |
| C(29)-S(9)-Co(4)   | 104.0(3) |
| C(30)-S(10)-Co(4)  | 106.3(3) |
| C(37)-S(11)-Co(4)  | 105.1(4) |
| C(36)-S(12)-Co(4)  | 104.5(4) |
| C(6)-C(1)-C(2)     | 116.3(8) |
| C(6)-C(1)-S(1)     | 123.9(8) |
| C(2)-C(1)-S(1)     | 119.6(7) |

|                   |           |
|-------------------|-----------|
| C(3)-C(2)-C(1)    | 120.6(8)  |
| C(3)-C(2)-S(2)    | 120.7(8)  |
| C(1)-C(2)-S(2)    | 118.6(7)  |
| C(2)-C(3)-C(4)    | 120.5(9)  |
| C(5)-C(4)-C(3)    | 120.1(9)  |
| C(4)-C(5)-C(6)    | 118.1(10) |
| C(5)-C(6)-C(1)    | 124.2(9)  |
| C(5)-C(6)-C(7)    | 119.6(9)  |
| C(1)-C(6)-C(7)    | 116.0(9)  |
| N(1)-C(7)-C(6)    | 177.5(14) |
| C(9)-C(8)-C(13)   | 117.7(12) |
| C(9)-C(8)-S(3)    | 120.4(12) |
| C(13)-C(8)-S(3)   | 121.9(12) |
| C(8)-C(9)-C(10)   | 122.0(12) |
| C(8)-C(9)-S(4)    | 119.4(12) |
| C(10)-C(9)-S(4)   | 118.5(12) |
| C(11)-C(10)-C(9)  | 119.9(14) |
| C(10)-C(11)-C(12) | 118.0(17) |
| C(13)-C(12)-C(11) | 122.2(16) |
| C(12)-C(13)-C(8)  | 120.2(14) |
| C(12)-C(13)-C(14) | 122.5(16) |
| C(8)-C(13)-C(14)  | 117.4(14) |
| N(2)-C(14)-C(13)  | 177.9(17) |
| C(16)-C(15)-C(20) | 119.3(8)  |
| C(16)-C(15)-S(5)  | 119.6(7)  |
| C(20)-C(15)-S(5)  | 121.1(8)  |
| C(15)-C(16)-C(17) | 118.3(9)  |
| C(15)-C(16)-S(6)  | 119.6(7)  |
| C(17)-C(16)-S(6)  | 122.1(8)  |
| C(18)-C(17)-C(16) | 119.6(10) |
| C(19)-C(18)-C(17) | 124.3(11) |
| C(18)-C(19)-C(20) | 116.2(10) |
| C(19)-C(20)-C(15) | 122.2(9)  |
| C(19)-C(20)-C(21) | 119.1(10) |
| C(15)-C(20)-C(21) | 118.7(10) |
| N(3)-C(21)-C(20)  | 174.8(15) |
| C(23)-C(22)-C(27) | 120.0     |
| C(23)-C(22)-S(7)  | 118.8(4)  |
| C(27)-C(22)-S(7)  | 121.2(4)  |
| C(24)-C(23)-C(22) | 120.0     |
| C(24)-C(23)-S(8)  | 120.3(4)  |
| C(22)-C(23)-S(8)  | 119.7(4)  |
| C(23)-C(24)-C(25) | 120.0     |
| C(24)-C(25)-C(26) | 120.0     |
| C(27)-C(26)-C(25) | 120.0     |
| C(28)-C(27)-C(26) | 118.4(7)  |

|                      |           |
|----------------------|-----------|
| C(28)-C(27)-C(22)    | 121.6(7)  |
| C(26)-C(27)-C(22)    | 120.0     |
| N(4)-C(28)-C(27)     | 177.0(12) |
| C(30)-C(29)-C(34)    | 120.0     |
| C(30)-C(29)-S(9)     | 121.4(5)  |
| C(34)-C(29)-S(9)     | 118.6(5)  |
| C(29)-C(30)-C(31)    | 120.0     |
| C(29)-C(30)-S(10)    | 117.2(5)  |
| C(31)-C(30)-S(10)    | 122.8(5)  |
| C(32)-C(31)-C(30)    | 120.0     |
| C(33)-C(32)-C(31)    | 120.0     |
| C(32)-C(33)-C(34)    | 120.0     |
| C(35)-C(34)-C(33)    | 116.3(8)  |
| C(35)-C(34)-C(29)    | 123.4(8)  |
| C(33)-C(34)-C(29)    | 120.0     |
| N(5)-C(35)-C(34)     | 168.2(13) |
| C(41)-C(36)-C(37)    | 118.0(9)  |
| C(41)-C(36)-S(12)    | 121.6(8)  |
| C(37)-C(36)-S(12)    | 120.4(8)  |
| C(38)-C(37)-C(36)    | 120.8(10) |
| C(38)-C(37)-S(11)    | 120.7(9)  |
| C(36)-C(37)-S(11)    | 118.5(9)  |
| C(37)-C(38)-C(39)    | 120.6(11) |
| C(38)-C(39)-C(40)    | 120.0(11) |
| C(39)-C(40)-C(41)    | 119.3(10) |
| C(36)-C(41)-C(40)    | 121.2(10) |
| C(36)-C(41)-C(42)    | 121.4(10) |
| C(40)-C(41)-C(42)    | 117.4(10) |
| N(6)-C(42)-C(41)     | 178.8(12) |
| C(2A)-C(1A)-C(6A)    | 119.7(10) |
| C(2A)-C(1A)-P(1)     | 121.0(8)  |
| C(6A)-C(1A)-P(1)     | 119.2(9)  |
| C(1A)-C(2A)-C(3A)    | 121.4(11) |
| C(4A)-C(3A)-C(2A)    | 118.8(13) |
| C(3A)-C(4A)-C(5A)    | 120.3(15) |
| C(4A)-C(5A)-C(6A)    | 123.0(14) |
| C(5A)-C(6A)-C(1A)    | 116.6(11) |
| C(8A)-C(7A)-C(12A)   | 118.7(8)  |
| C(8A)-C(7A)-P(1)     | 120.1(8)  |
| C(12A)-C(7A)-P(1)    | 121.2(8)  |
| C(7A)-C(8A)-C(9A)    | 121.0(10) |
| C(10A)-C(9A)-C(8A)   | 118.9(11) |
| C(11A)-C(10A)-C(9A)  | 121.6(11) |
| C(10A)-C(11A)-C(12A) | 121.4(10) |
| C(7A)-C(12A)-C(11A)  | 118.4(10) |
| C(18A)-C(13A)-C(14A) | 117.9(10) |

|                      |           |
|----------------------|-----------|
| C(18A)-C(13A)-P(1)   | 123.0(9)  |
| C(14A)-C(13A)-P(1)   | 119.1(9)  |
| C(15A)-C(14A)-C(13A) | 120.0(12) |
| C(16A)-C(15A)-C(14A) | 120.5(14) |
| C(15A)-C(16A)-C(17A) | 121.7(14) |
| C(16A)-C(17A)-C(18A) | 119.5(13) |
| C(13A)-C(18A)-C(17A) | 120.2(11) |
| C(20A)-C(19A)-C(24A) | 116.8(8)  |
| C(20A)-C(19A)-P(1)   | 122.5(7)  |
| C(24A)-C(19A)-P(1)   | 120.7(7)  |
| C(19A)-C(20A)-C(21A) | 120.4(9)  |
| C(22A)-C(21A)-C(20A) | 121.2(9)  |
| C(23A)-C(22A)-C(21A) | 119.3(10) |
| C(22A)-C(23A)-C(24A) | 121.3(9)  |
| C(23A)-C(24A)-C(19A) | 120.9(8)  |
| C(6B)-C(1B)-C(2B)    | 118.6(9)  |
| C(6B)-C(1B)-P(2)     | 118.6(8)  |
| C(2B)-C(1B)-P(2)     | 122.7(9)  |
| C(3B)-C(2B)-C(1B)    | 119.2(10) |
| C(4B)-C(3B)-C(2B)    | 121.1(12) |
| C(5B)-C(4B)-C(3B)    | 119.9(11) |
| C(4B)-C(5B)-C(6B)    | 120.3(12) |
| C(5B)-C(6B)-C(1B)    | 120.9(10) |
| C(12B)-C(7B)-C(8B)   | 118.1(8)  |
| C(12B)-C(7B)-P(2)    | 122.4(7)  |
| C(8B)-C(7B)-P(2)     | 119.3(7)  |
| C(7B)-C(8B)-C(9B)    | 121.9(9)  |
| C(10B)-C(9B)-C(8B)   | 119.2(10) |
| C(9B)-C(10B)-C(11B)  | 120.6(10) |
| C(10B)-C(11B)-C(12B) | 120.1(10) |
| C(7B)-C(12B)-C(11B)  | 120.1(9)  |
| C(14B)-C(13B)-C(18B) | 119.1(8)  |
| C(14B)-C(13B)-P(2)   | 122.3(7)  |
| C(18B)-C(13B)-P(2)   | 118.6(7)  |
| C(13B)-C(14B)-C(15B) | 119.0(8)  |
| C(16B)-C(15B)-C(14B) | 120.3(10) |
| C(15B)-C(16B)-C(17B) | 121.5(10) |
| C(16B)-C(17B)-C(18B) | 119.3(9)  |
| C(17B)-C(18B)-C(13B) | 120.7(9)  |
| C(24B)-C(19B)-C(20B) | 116.9(9)  |
| C(24B)-C(19B)-P(2)   | 122.7(8)  |
| C(20B)-C(19B)-P(2)   | 120.4(7)  |
| C(21B)-C(20B)-C(19B) | 121.3(8)  |
| C(20B)-C(21B)-C(22B) | 120.7(9)  |
| C(23B)-C(22B)-C(21B) | 118.2(10) |
| C(24B)-C(23B)-C(22B) | 120.9(9)  |

|                      |           |
|----------------------|-----------|
| C(23B)-C(24B)-C(19B) | 121.8(9)  |
| C(6C)-C(1C)-C(2C)    | 119.7(9)  |
| C(6C)-C(1C)-P(3)     | 120.3(8)  |
| C(2C)-C(1C)-P(3)     | 120.0(8)  |
| C(3C)-C(2C)-C(1C)    | 118.3(10) |
| C(4C)-C(3C)-C(2C)    | 121.3(12) |
| C(3C)-C(4C)-C(5C)    | 120.5(12) |
| C(4C)-C(5C)-C(6C)    | 119.5(12) |
| C(1C)-C(6C)-C(5C)    | 120.5(11) |
| C(12C)-C(7C)-C(8C)   | 120.7(9)  |
| C(12C)-C(7C)-P(3)    | 120.3(8)  |
| C(8C)-C(7C)-P(3)     | 118.9(8)  |
| C(9C)-C(8C)-C(7C)    | 119.4(10) |
| C(10C)-C(9C)-C(8C)   | 118.8(12) |
| C(9C)-C(10C)-C(11C)  | 123.3(13) |
| C(10C)-C(11C)-C(12C) | 118.7(12) |
| C(7C)-C(12C)-C(11C)  | 119.2(11) |
| C(18C)-C(13C)-C(14C) | 116.9(9)  |
| C(18C)-C(13C)-P(3)   | 120.4(8)  |
| C(14C)-C(13C)-P(3)   | 122.8(8)  |
| C(13C)-C(14C)-C(15C) | 119.8(10) |
| C(16C)-C(15C)-C(14C) | 120.8(11) |
| C(15C)-C(16C)-C(17C) | 120.3(12) |
| C(18C)-C(17C)-C(16C) | 117.9(11) |
| C(17C)-C(18C)-C(13C) | 124.2(10) |
| C(20C)-C(19C)-C(24C) | 118.0(10) |
| C(20C)-C(19C)-P(3)   | 120.5(9)  |
| C(24C)-C(19C)-P(3)   | 121.4(9)  |
| C(19C)-C(20C)-C(21C) | 119.7(11) |
| C(22C)-C(21C)-C(20C) | 118.1(14) |
| C(23C)-C(22C)-C(21C) | 125.4(17) |
| C(22C)-C(23C)-C(24C) | 118.0(14) |
| C(23C)-C(24C)-C(19C) | 120.5(11) |
| C(6D)-C(1D)-C(2D)    | 119.3(9)  |
| C(6D)-C(1D)-P(4)     | 120.6(8)  |
| C(2D)-C(1D)-P(4)     | 120.0(8)  |
| C(3D)-C(2D)-C(1D)    | 119.6(11) |
| C(4D)-C(3D)-C(2D)    | 120.0(11) |
| C(5D)-C(4D)-C(3D)    | 120.8(12) |
| C(4D)-C(5D)-C(6D)    | 120.7(12) |
| C(5D)-C(6D)-C(1D)    | 119.4(10) |
| C(8D)-C(7D)-C(12D)   | 118.7(10) |
| C(8D)-C(7D)-P(4)     | 121.0(8)  |
| C(12D)-C(7D)-P(4)    | 120.3(9)  |
| C(7D)-C(8D)-C(9D)    | 118.0(10) |
| C(10D)-C(9D)-C(8D)   | 121.0(12) |

|                      |           |
|----------------------|-----------|
| C(9D)-C(10D)-C(11D)  | 122.8(14) |
| C(10D)-C(11D)-C(12D) | 115.1(13) |
| C(11D)-C(12D)-C(7D)  | 124.3(13) |
| C(18D)-C(13D)-C(14D) | 120.8(10) |
| C(18D)-C(13D)-P(4)   | 115.7(8)  |
| C(14D)-C(13D)-P(4)   | 123.6(8)  |
| C(13D)-C(14D)-C(15D) | 118.0(10) |
| C(16D)-C(15D)-C(14D) | 119.9(11) |
| C(17D)-C(16D)-C(15D) | 121.0(12) |
| C(16D)-C(17D)-C(18D) | 122.2(11) |
| C(17D)-C(18D)-C(13D) | 118.1(10) |
| C(20D)-C(19D)-C(24D) | 118.8(11) |
| C(20D)-C(19D)-P(4)   | 122.0(11) |
| C(24D)-C(19D)-P(4)   | 119.2(11) |
| C(19D)-C(20D)-C(21D) | 119.9(13) |
| C(22D)-C(21D)-C(20D) | 120.5(15) |
| C(23D)-C(22D)-C(21D) | 116.4(17) |
| C(24D)-C(23D)-C(22D) | 125.3(17) |
| C(23D)-C(24D)-C(19D) | 119.1(14) |
| C(6E)-C(1E)-C(2E)    | 116.8(9)  |
| C(6E)-C(1E)-P(5)     | 121.8(7)  |
| C(2E)-C(1E)-P(5)     | 121.4(8)  |
| C(3E)-C(2E)-C(1E)    | 121.3(10) |
| C(4E)-C(3E)-C(2E)    | 120.9(11) |
| C(3E)-C(4E)-C(5E)    | 119.4(10) |
| C(4E)-C(5E)-C(6E)    | 118.5(10) |
| C(1E)-C(6E)-C(5E)    | 122.7(9)  |
| C(12E)-C(7E)-C(8E)   | 117.8(8)  |
| C(12E)-C(7E)-P(5)    | 120.5(7)  |
| C(8E)-C(7E)-P(5)     | 121.5(7)  |
| C(9E)-C(8E)-C(7E)    | 120.5(9)  |
| C(10E)-C(9E)-C(8E)   | 118.3(10) |
| C(11E)-C(10E)-C(9E)  | 124.3(12) |
| C(10E)-C(11E)-C(12E) | 119.3(11) |
| C(7E)-C(12E)-C(11E)  | 119.8(9)  |
| C(18E)-C(13E)-C(14E) | 118.5(8)  |
| C(18E)-C(13E)-P(5)   | 122.5(7)  |
| C(14E)-C(13E)-P(5)   | 119.0(7)  |
| C(15E)-C(14E)-C(13E) | 118.2(9)  |
| C(16E)-C(15E)-C(14E) | 123.4(9)  |
| C(15E)-C(16E)-C(71E) | 118.4(9)  |
| C(16E)-C(71E)-C(18E) | 120.8(10) |
| C(13E)-C(18E)-C(71E) | 120.5(9)  |
| C(24E)-C(19E)-C(20E) | 118.7(9)  |
| C(24E)-C(19E)-P(5)   | 123.3(8)  |
| C(20E)-C(19E)-P(5)   | 117.9(8)  |



|                      |           |
|----------------------|-----------|
| C(21E)-C(20E)-C(19E) | 121.1(10) |
| C(20E)-C(21E)-C(22E) | 120.1(12) |
| C(23E)-C(22E)-C(21E) | 119.4(12) |
| C(22E)-C(23E)-C(24E) | 120.8(11) |
| C(19E)-C(24E)-C(23E) | 119.8(10) |
| C(6F)-C(1F)-C(2F)    | 116.1(10) |
| C(6F)-C(1F)-P(6)     | 124.2(8)  |
| C(2F)-C(1F)-P(6)     | 119.6(9)  |
| C(1F)-C(2F)-C(3F)    | 122.1(11) |
| C(4F)-C(3F)-C(2F)    | 119.0(14) |
| C(3F)-C(4F)-C(5F)    | 121.6(14) |
| C(4F)-C(5F)-C(6F)    | 118.5(11) |
| C(1F)-C(6F)-C(5F)    | 122.6(10) |
| C(8F)-C(7F)-C(12F)   | 117.7(11) |
| C(8F)-C(7F)-P(6)     | 123.6(8)  |
| C(12F)-C(7F)-P(6)    | 118.3(9)  |
| C(7F)-C(8F)-C(9F)    | 124.2(11) |
| C(10F)-C(9F)-C(8F)   | 114.8(12) |
| C(11F)-C(10F)-C(9F)  | 126.1(14) |
| C(10F)-C(11F)-C(12F) | 117.9(14) |
| C(7F)-C(12F)-C(11F)  | 117.5(13) |
| C(14F)-C(13F)-C(18F) | 118.8(10) |
| C(14F)-C(13F)-P(6)   | 120.7(9)  |
| C(18F)-C(13F)-P(6)   | 120.3(9)  |
| C(15F)-C(14F)-C(13F) | 120.4(12) |
| C(16F)-C(15F)-C(14F) | 120.4(13) |
| C(15F)-C(16F)-C(17F) | 121.0(13) |
| C(16F)-C(17F)-C(18F) | 120.0(12) |
| C(17F)-C(18F)-C(13F) | 119.2(11) |
| C(24F)-C(19F)-C(20F) | 119.5(9)  |
| C(24F)-C(19F)-P(6)   | 119.4(7)  |
| C(20F)-C(19F)-P(6)   | 121.1(8)  |
| C(21F)-C(20F)-C(19F) | 120.0(10) |
| C(20F)-C(21F)-C(22F) | 120.4(11) |
| C(21F)-C(22F)-C(23F) | 120.9(10) |
| C(22F)-C(23F)-C(24F) | 118.5(11) |
| C(19F)-C(24F)-C(23F) | 120.7(10) |

Symmetry transformations used to generate equivalent atoms: #1 -x,-y+2,-z #2 -x+1,-y+1,-z

## Electrical Transport Measurements

The electrical conductivity of the bisdithiolene complexes was measured only at room temperature because they are all insulating. In the case of the  $(\text{Ph}_4\text{P})_2[\text{Fe}(\text{III})(3\text{cbdt})_2]_2$  (**1**) due to the very small dimensions of the polycrystalline samples it was measured as a compressed pellet and the conductivity is of the order of  $10^{-8}\text{S/cm}$ . The sample  $(\text{Ph}_4\text{P})_2[\text{Co}(\text{III})(3\text{cbdt})_2]_2$  (**2**) was measured by a two point method with a Keithley 197 Electrometer and we could only estimate an upper limit for the conductivity as  $4 \times 10^{-8}\text{ S/cm}$ . Finally, the electrical conductivity of the Co dimer long single crystals  $(\text{Ph}_4\text{P})_2[\text{Co}(\text{II})(3\text{cbdt})_2]$  (**3**) was measured by a four point method with a Keithley 224 current source and a Keithley 197 Electrometer and a value of  $3 \times 10^{-7}\text{ S/cm}$  was obtained. The dimeric complexes (**1** and **2**) were insulators as expected. The dianionic Co compound (**3**), due to the absence of short anion-anion interactions and with anionic complexes being surrounded by bulky  $\text{Ph}_4\text{P}$  cations, is not surprising that is also insulator.
